# Supplementary material
Source: PubMed Central journal article supplement (PMC4136164)
Supplement: JCM.00931-14_zjm999093578so1.pdf [file JCM.00931-14_zjm999093578so1.pdf]

**Table S1.** PCR and sequencing primers used for confirmation of A/T-tracts and SNPs.

| Gene     | Primer  | Primer sequence              |
|----------|---------|------------------------------|
| CAMP0019 | reverse | 3' AAGTATTGCGGGATTTAGAA 5'   |
|          | forward | 5' GCTATGGAATTTGCGGATTT 3'   |
| CAMP0608 | reverse | 3' CCCAGTTTAATGTCTATCTT 5'   |
|          | forward | 5' TTAAATGGAGCTTATGTCTT 3'   |
| CAMP0624 | reverse | 3' TATCCGCTTTACTTACCT 5'     |
|          | forward | 5' GCGTGAGTTTGCCTATTT 3'     |
| CAMP0935 | reverse | 3' CTATTCGTTAGTACGGATTT 5'   |
|          | forward | 5' GCCCTTATGGTACACTTTAT 3'   |
| CAMP1031 | reverse | 3' GAAGCCGATATTGTTATTGC 5'   |
|          | forward | 5' TAAACATCTATCCCTCCCTT 3'   |
| CAMP1108 | reverse | 3' GTAAATGTTAGCGTAGTATTCG 5' |
|          | forward | 5' GCCTTGTTGCTGTTCTGC 3'     |
| CAMP1113 | reverse | 3' TTGGTTCTTTCCGAATGGAC 5'   |
|          | forward | 5' TATCGCATTGTTATTGGG 3'     |
| CAMP1242 | reverse | 3' TATGGCTTCTTTGAGGATCG 5'   |
|          | forward | 5' GGGGAATGATTTATTGTGAT 3'   |

**Table S2.** Distance matrix (numbers of allelic differences) of the six milk-borne *C. jejuni* outbreak-associated isolates and two references strains (*C. jejuni* PT14 and 1\_12S) based on 1404-shared loci.

|         | 1_12S | Le_204R | Le_755 | Ma_1 | Ma_B | Po_1 | Po_2 | PT14 |
|---------|-------|---------|--------|------|------|------|------|------|
| 1_12S   | 0     |         |        |      |      |      |      |      |
| Le_204R | 420   | 0       |        |      |      |      |      |      |
| Le_755  | 418   | 9       | 0      |      |      |      |      |      |
| Ma_1    | 419   | 9       | 4      | 0    |      |      |      |      |
| Ma_B    | 418   | 9       | 3      | 6    | 0    |      |      |      |
| Po_1    | 418   | 12      | 9      | 10   | 9    | 0    |      |      |
| Po_2    | 419   | 9       | 4      | 2    | 5    | 8    | 0    |      |
| PT14    | 281   | 454     | 452    | 453  | 452  | 453  | 453  | 0    |

**Table S3.** Distance matrix (numbers of allelic differences) of the six milk-borne outbreak-associated *Campylobacter jejuni* isolates based on 1432-shared loci.

|         | Le_204R | Le_755 | Ma_1 | Ma_B | Po_1 | Po_2 |
|---------|---------|--------|------|------|------|------|
| Le_204R | 0       |        |      |      |      |      |
| Le_755  | 10      | 0      |      |      |      |      |
| Ma_1    | 10      | 4      | 0    |      |      |      |
| Ma_B    | 10      | 3      | 6    | 0    |      |      |
| Po_1    | 12      | 8      | 9    | 8    | 0    |      |
| Po_2    | 10      | 4      | 2    | 5    | 7    | 0    |
